# Supplementary material for: Evaluating the streamflow simulation capability of PERSIANN-CDR daily rainfall products in two river basins on the Tibetan Plateau
Source: Copernicus journal article supplement (doi:10.5194/hess-2016-282), 2016-06-23
Supplement: Supplementary file [file hess-2016-282-AC2-supplement.pdf]

**Evaluating the streamflow simulation capability of PERSIANN-CDR  
daily rainfall products in two river basins on the Tibetan Plateau**

Xiaomang Liu<sup>1,2</sup>, Tiantian Yang<sup>2</sup>, Koulin Hsu<sup>2</sup>, Changming Liu<sup>1</sup> and Soroosh  
Sorooshian<sup>2</sup>

1 Key Laboratory of Water Cycle & Related Land Surface Process, Institute of  
Geographic Sciences and Natural Resources Research, Chinese Academy of Sciences,  
100101 Beijing, China

2 Department of Civil and Environmental Engineering, University of California, Irvine,  
California, USA

\*Corresponding author: Tiantian Yang, Email: [tiantiay@uci.edu](mailto:tiantiay@uci.edu)

## Abstract:

On the Tibetan Plateau, the limited ground-based rainfall information owing to a harsh environment has brought great challenges to hydrological studies. Satellite-based rainfall products, which allow a better coverage than both radar network and rain gauges on the Tibetan Plateau, can be suitable alternatives for studies on investigating the hydrological processes and climate change. In this study, a newly developed daily satellite-based precipitation product, termed Precipitation Estimation from Remotely Sensed Information Using Artificial Neural Networks–Climate Data Record (PERSIANN-CDR), is used as input of a hydrologic model to simulate streamflow in the upper Yellow and Yangtze River Basin on the Tibetan Plateau. The results show that the simulated streamflows using PERSIANN-CDR precipitation and [the Global Land Data Assimilation System \(GLDAS\)](#) precipitation are closer to observation than that using limited gauge-based precipitation interpolation in the upper Yangtze River Basin. The simulated streamflow using gauge-based precipitation are higher than the streamflow observation during the wet season. In the upper Yellow River Basin, gauge-based precipitation, [GLDAS](#) precipitation and PERSIANN-CDR precipitation have similar good performance in simulating streamflow. The evaluation of streamflow simulation capability in this study partly indicates that PERSIANN-CDR rainfall product has good potentials to be a reliable dataset and an alternative information source of limited gauge network for conducting long term hydrological and climate studies on the Tibetan Plateau.

Key Words: PERSIANN-CDR daily rainfall product; Streamflow simulation; Tibetan Plateau

## 1. Introduction

Precipitation is one of the essential meteorological inputs of hydrologic model and the key driving force for hydrologic cycle. Errors in precipitation estimation can bring significant uncertainties in streamflow simulation and prediction (Sorooshian et al., 2011). Three methods are generally used to measure precipitation: traditional gauge observations, meteorological radar observations and satellite observations (Ashouri et al., 2015). In many remote regions and mountainous area, rain gauges and meteorological radar networks are either sparse or non-existent. Thus, satellite-based precipitation is of great importance in such regions. For instance, there is a great potential of using satellite-based precipitation estimate on the Tibetan Plateau known as the “roof of the world” with an average elevation of over 4000m (Yao et al., 2012). Owing to a harsh environment, the existing meteorological stations managed by the Chinese Meteorological Administration only form an extremely sparse network, which create great challenges for water resources management and operation. For example, on average, there is only 0.3 and 1 station per grid of  $1^{\circ} \times 1^{\circ}$  in the upper Yangtze and upper Yellow river basins, respectively (Xue et al., 2013a). Moreover, the spatial distribution of the meteorological stations is highly uneven and most stations are located around the river channel with relatively low elevation [Figure 1]. Therefore, streamflow simulation using the limited gauge-based rainfall information might not be reliable due to the input uncertainties with such a poor spatial resolution. Satellite-based rainfall products have the advantage of good spatial coverage, which could allow an accurate streamflow simulation on the Tibetan Plateau. Besides precipitation estimation from satellites, the Global Land Data Assimilation System (GLDAS), as a global-scale terrestrial modeling system, is also capable of providing a

good spatial coverage to solve the issue of insufficient observation data over the Tibetan Plateau area (Wang et al., 2011).

According to Kidd and Levizzani (2011), during the last decade satellite-based precipitation estimates have reached a good level of maturity. Currently, there are many satellite rainfall products are available and have been extensively used globally (e.g., Sorooshian et al., 2000; Huffman et al., 2001; Adler et al., 2003; Xie et al., 2003; Joyce et al., 2004; Turk and Miller, 2005). Recently, a new satellite-based precipitation product is released by National Climatic Data Center (NCDC), which is termed Precipitation Estimation from Remotely Sensed Information Using Artificial Neural Networks–Climate Data Record (PERSIANN-CDR) (Ashouri et al., 2015). PERSIANN-CDR is a multi-satellite, high-resolution and post-time rainfall product that provides daily precipitation estimates at  $0.25^\circ$  spatial resolution from 1 January 1983 to the present. According to Ashouri et al., (2015), PERSIANN-CDR rainfall product uses the archive of Gridded Satellite (GridSat-B1) Infrared Radiation (IR) data (Knapp, 2008) as the input to the Artificial Neural Network algorithm. The retrieval algorithm uses IR satellite data from global geosynchronous satellites as the primary source of precipitation information. To meet the calibration requirement of PERSIANN, the model is pre-trained using the National Centers for Environmental Prediction (NCEP) stage IV hourly precipitation data. Then, the parameters of the model are kept fixed and the model is run for the full historical record of GridSat-B1 IR data. To reduce the biases in the estimated precipitation, while preserving the temporal and spatial patterns in high resolution, the resulting estimates are then adjusted using the Global Precipitation Climatology Project (GPCP) monthly  $2.5^\circ$  precipitation products. The performance of PERSIANN-CDR

rainfall product has been tested and reported in different regions (e.g., Ashouri et al. 2015; Miao et al., 2015; Zhu et al., 2016). Ashouri et al. (2015) found that PERSIANN-CDR precipitation is performing reasonably well when compared with radar and ground-based observations in the 1986 Sydney flood event of Australia and the 2005 Hurricane Katrina of United States. Zhu et al. (2016) compared precipitation estimation from PERSIANN-CDR, TRMM-3B42-V7 and CMORPH over the Xiang and Qu River Basins in China and demonstrated the accuracy of PERSIANN-CDR. Miao et al. (2015) shows that PERSIANN-CDR rainfall product is able to capture the spatial and temporal characteristics of extreme precipitation events at daily scale in the eastern China monsoon region when compared with ground-based precipitation dataset. Miao et al. (2015) also pointed out that the correlation between the PERSIANN-CDR precipitation and ground-based precipitation is not strong on the Tibetan Plateau and speculated that the sparse ground-based gauge stations may result in uncertainties of the use of ground-based precipitation estimates as reference on the Tibetan Plateau. Building on Miao et al. (2015), in this study, PERSIANN-CDR is further applied to a conceptual hydrological model to simulate streamflow of two river basins on the Tibetan Plateau, and is compared with limited gauge information, and precipitation from GLDAS with regard to their streamflow simulation capability.

Many studies have been carried out to evaluate the suitability of a number of satellite-based precipitation estimate products in forcing hydrologic models and simulating streamflow for various regions around the world (e.g., Yilmaz et al., 2005; Artan et al., 2007; Su et al., 2011; Bitew et al., 2012; Yong et al., 2012). However, there are few evaluation works focusing on hydrological modeling driven by satellite rainfall

products on the Tibetan Plateau. Among limited number of studies, Tong et al. (2014) evaluated the streamflow simulation capability of four satellite products (TRMM-3B42-V7, TRMM-3B42RT-V7, PERSIANN and CMORPH) using the Variable Infiltration Capacity (VIC) hydrologic model in two sub-basins over the Tibetan Plateau and concluded that the TRMM-3B42-V7 and CMORPH datasets have relative better performance than others. One of the limitations is that the data length of many satellite precipitation products, such as TRMM-3B42RT-V7 and CMORPH only starts from 2000 to the present, which is rather short. In this study, there is no such limitation because PERSIANN-CDR daily rainfall product includes more than 33 years of data and the length of data grows every year. In Tong et al, (2014), the rain-gauge is set to be reference to compare different satellite-based rainfall products. However, given the facts that (1) density of rain-gauges on Tibetan Plateau is rather low as compared to other regions in China, (2) distribution of gauges are uneven according to Miao et al, (2015), and (3) rain-gauges are located in low elevation river channels (Figure 1), authors have the similar concern as Miao et al. (2015) that the use of sparse rain-gauge as reference to compare satellite products is arguable. Therefore, in this study, [precipitation from limited gauge-network, GLDAS precipitation and PERSIANN-CDR precipitation](#) are used as the inputs of a hydrologic model for streamflow simulation on two major river basins, the upper Yangtze River Basin and the upper Yellow River Basin, on the Tibetan Plateau. Then, the simulation results are compared with observed streamflow, which is believed to be a more reliable reference than the limited rainfall observation to judge the qualities of satellite rainfall products on the Tibetan Plateau. Potential sources of uncertainties are also discussed with regard to the parameterization of hydrological model and the length

of data used for calibration.

## **2. Study region, data and hydrological modeling**

### **2.1 Study region and data**

Two river basins on the northern Tibetan Plateau, namely, the upper Yangtze River (UYZR) and upper Yellow River (UYLR) basins are selected, which have a long daily streamflow record from 1983 to 2012. As shown with red squares in Figure 1, two hydrological stations, Tangnaihai and Zhimenda, are the outlet stations of the UYZR and UYLR, which have total drainage areas of 121,972 and 137,704 km<sup>2</sup>, respectively. Elevation in the region varies from 3450 to 6621m. According to Yao et al. (2012), the climate system of the two regions has distinct summer Indian monsoon and East Asian monsoon characteristics during summer. Figure 1 shows the distribution of meteorological and hydrological stations in the two basins. The green triangles show the location of rain-gauges, which are rather unevenly distributed and sparse as compared to the gauge distribution of China available from Miao et al. (2015).

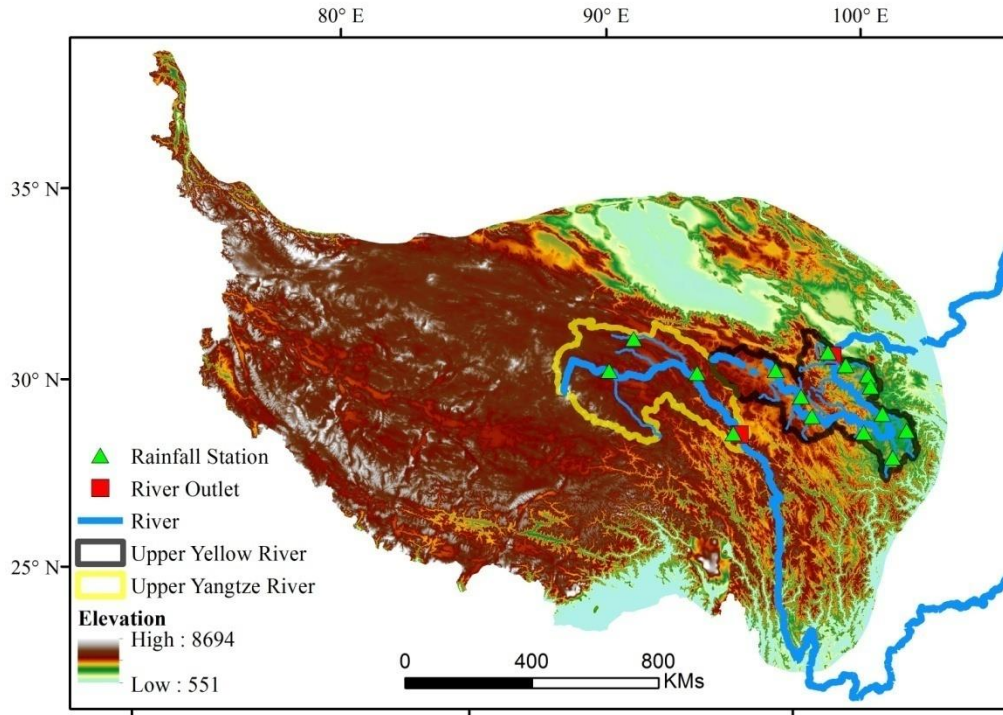

Figure 1. The selected river basins (the upper Yellow River and Yangtze River Basin) on the Tibetan Plateau and location of rainfall stations and river outlets.

The observed daily streamflow data from 1983 to 2012 at the outlets of the two basins is provided by the Ministry of Water Resources of China. The runoff is calculated by dividing streamflow by corresponding basin area. The daily gauge meteorological data in the two basins from 1983 to 2012 is obtained from the China Meteorological Administration (<http://cdc.cma.gov.cn>). There are 4 and 11 meteorological stations in the UYZR and UYLR respectively, which means that on average there is only 0.3 and 1 station per grid of  $1^{\circ} \times 1^{\circ}$  in the two basins, respectively. The precipitation data in GLDAS comes from three different sources: the Climate Prediction Center Merged Analysis of Precipitation, Global Data Assimilation System, and the European Centre for Medium-Range Weather Forecasts (Rodell et al., 2004). The precipitation data used in GLDAS is a combination of reanalysis and observations, which is believed to have the



advantages of different data sources (Gottschalck et al., 2005). In this study, the 1.0-degree-resolution GLDAS precipitation dataset is re-sampled into  $0.25^{\circ} \times 0.25^{\circ}$  grids and used as the input of streamflow simulations (<http://ldas.gsfc.nasa.gov/gldas/>). The PERSIANN-CDR rainfall dataset is available at the NOAA NCDC website (<ftp://data.ncdc.noaa.gov/cdr/persiann/files/>), as well as the Center for Hydrometeorology and Remote Sensing (CHRS) at the University of California, Irvine. In order to compare PERSIANN-CDR with gauge observation, the gauge precipitation is interpolated into  $0.25^{\circ} \times 0.25^{\circ}$  grids with the inverse distance weighting interpolation method, which has been demonstrated as being efficient in precipitation interpolation applications (e.g., Nalder and Wein, 1998; Garcia et al., 2008; Ly et al., 2011). The daily gauge-based precipitation, GLDAS precipitation and PERSIANN-CDR precipitation for basin average are compared by the cumulative distribution functions (CDFs) of daily precipitation value (e.g., Sheffield et al., 2014; Zhang and Tang, 2015), wherein the two-parameter Gamma distribution function (Thom, 1958) is used to fit the data.

## **2.2 Hydrological modeling**

The hydrologic model used in this study is the Hydro-Informatic Modeling System (HIMS) rainfall-runoff model (Liu et al., 2006, 2008, 2010a, 2010b), which is one of the operational hydrological models by the Tibet Government in China. The HIMS model is a grid-based hydrologic model, which is able to simulate the dominant hydrological processes such as actual evapotranspiration, infiltration, runoff, groundwater recharge and channel routing. In HIMS model, a catchment is divided into grids, and grids are linked throughout the stream network based on topological relationships of channel network and properties of soil, vegetation and land use. In each grid, actual evaporation is

calculated by a formulation between soil water content and potential evapotranspiration. Potential evapotranspiration  $ET_0$  (Hargreaves and Samani, 1985) and actual evaporation  $ET_a$  are described as follows:

$$ET_0 = 0.00023 \cdot RA \cdot (T + 17.8) \cdot (T_{\max} - T_{\min})^{0.50} \quad (1)$$

$$ET_a(t) = ET_0(t) \cdot (1 - (1 - \frac{SMS_t}{SMSC})^C) \quad (2)$$

where  $RA$  is extraterrestrial radiation ( $\text{MJ m}^{-2} \text{d}^{-1}$ );  $T$ ,  $T_{\max}$  and  $T_{\min}$  are daily average, maximum and minimum temperatures ( $^{\circ}\text{C}$ ), respectively;  $L$  is latent heat of vaporization ( $\text{MJ kg}^{-1}$ );  $SMS$  and  $SMSC$  are soil moisture storage and the maximum soil storage capacity (mm), respectively; and  $C$  is the evapotranspiration coefficient to be calibrated.

Infiltration process is modeled using an empirical relationship, which has been confirmed through analysis of data measured in a number of experimental watersheds and various physical geographic factors in China (Liu et al., 2006):

$$f_t = R \cdot P_t^r \quad (3)$$

where  $f_t$  is infiltration (mm) and  $P_t$  is precipitation (mm).  $R$  and  $r$  are parameters. Surface runoff  $RS_t$  (mm) is calculated by:

$$RS_t = P_t - f_t = P_t - R \cdot P_t^r \quad (4)$$

According to the saturation excess mechanism and spatial variability of watershed characteristics, interflow and groundwater recharge are estimated as linear functions of soil wetness (soil moisture amount divided by soil moisture capacity). Baseflow is simulated based on the linear reservoir assumption, in which the relationship between groundwater storage and outflow is linear. Interflow  $RI$  (mm), groundwater recharge  $REC$  (mm), baseflow  $RG$  (mm), and total runoff  $TR$  (mm) are determined by:

$$RI_t = L_a \times (SMS_t / SMSC) \times f_t \quad (5)$$

$$REC_t = R_c \times (SMS_t / SMSC) \times (f_t - RI_t) \quad (6)$$

$$RG_t = K_b \times (GW_t + REC_t) \quad (7)$$

$$TR_t = RS_t + RI_t + RG_t \quad (8)$$

where  $L_a$ ,  $R_c$  and  $K_b$  are coefficients for interflow, groundwater recharge and baseflow, respectively;  $SMSC$  is the maximum value of soil moisture storage capacity(mm);  $SMS$  is the actual soil moisture storage (mm); and  $GW$  is groundwater storage(mm).  $L_a$ ,  $R_c$ ,  $K_b$  and  $SMSC$  are the parameters in need of calibration. The degree-day snowmelt algorithm (Hock, 2003) assuming an empirical relationship between air temperature and snowmelt rate is used to simulate snowmelt runoff. The air temperature within each grid is adjusted by a commonly used temperature lapse rate ( $0.65^\circ\text{C}/100\text{m}$ ). The degree-day factor of snowmelt is set to  $4.1\text{mm}^\circ\text{C}^{-1}\text{ day}^{-1}$  in the two basins based on the investigation of Zhang et al. (2006). Surface runoff and baseflow for each grid are routed to the basin outlet through a channel network. The Muskingum method (Franchini and Lamberti, 1994) is used for flow channel routing. The detail descriptions and [the conceptual diagram showing the configuration of HIMS model](#) are available in Liu et al. (2008) and Jiang et al. (2015).

The HIMS model is set up at  $0.25^\circ \times 0.25^\circ$  spatial resolution grids in the two river basins. There are nine parameters requiring calibration in the HIMS model (Table 1). The Shuffle Complex Evolution method (SCE-UA) is used for calibrating the model parameters (Duan et al., 1992). The optimization objective is to maximize the Nash-Sutcliffe efficiency ( $NSE$ ) (Nash and Sutcliffe, 1970) between the simulated and

measured daily streamflow. There are two stopping criteria for calibrating the parameters. The first one is the evolution of all simplexes have converged to a limited parameter space, which is the default convergence criterion of SCE-UA. Another stopping criterion is the maximum number of function evaluation set by users is met. In our study, the settings for SCE-UA are: maximum number of function evaluation equals to  $5 \times 10^8$ ; numbers of complexes equals to 2, which gives a total population of 38; and the percentage change allowed to define convergence is set to  $1 \times 10^{-6}$ . The calibration period is from 1983 to 1997 and the verification period is from 1998 to 2012. The performance of the streamflow simulation is evaluated by comparing simulated and observed streamflow through two statistics: *NSE* and relative bias (*Rb*) between simulated and observed streamflow:

$$NSE = 1 - \frac{\sum_{i=1}^N (Q_{obs,i} - Q_{sim,i})^2}{\sum_{i=1}^N (Q_{obs,i} - \overline{Q_{obs}})^2} \quad (9)$$

$$Rb = \frac{\sum_{i=1}^N (Q_{sim,i} - Q_{obs,i})}{\sum_{i=1}^N Q_{obs,i}} \quad (10)$$

where  $Q_{sim}$  and  $Q_{obs}$  are the simulated and observed streamflow, respectively;  $\overline{Q_{obs}}$  is the mean of the observed streamflow; and  $N$  is the total number of days in the calibration period.

Table 1 Description of HIMS model parameters and allowable ranges.

| Parameter | Description                            | Allowable range |
|-----------|----------------------------------------|-----------------|
| $SMSC$    | The maximum soil storage capacity (mm) | 50-1000         |
| $R$       | The infiltration coefficient           | 0.1-2           |
| $r$       | The infiltration coefficient           | 0.1-1           |

|       |                                      |          |
|-------|--------------------------------------|----------|
| $L_a$ | The interflow coefficient            | 0.1-2    |
| $R_C$ | The groundwater recharge coefficient | 0.01-2   |
| $C$   | The evapotranspiration coefficient   | 0.001-10 |
| $K_b$ | The baseflow coefficient             | 0.001-1  |
| $C_1$ | The Muskingum coefficient            | 0.001-1  |
| $C_2$ | The Muskingum coefficient            | 0.001-1  |

### 3. Results

#### 3.1 Hydrometrological characteristics of the two basins

Figure 2 and Table 2 show the average monthly amounts of precipitation and runoff in the UYZR and UYLR from 1983 to 2012. These two river basins have distinct dry and wet seasons, which are from Sep. to Feb., and Mar. to Oct., respectively. According to Table 2, precipitation between May and October (wet season) accounts for 92.5% and 90.1% of the annual total precipitation for the UYZR and UYLR, respectively. Similar to the temporal distribution of precipitation, runoff during May to October accounts for 87.6% and 78.4% of annual runoff in the UYZR and UYLR, respectively. Given the seasonal concurrence of precipitation and runoff, thus, precipitation in wet season plays a dominant role in annual runoff generation in these two river basins. The runoff coefficients are 0.22, 0.27 and 0.26 in the UYZR based on gauge-based precipitation, GLDAS precipitation and PERSIANN-CDR precipitation, respectively. In the UYLR, the runoff coefficients are 0.29, 0.31 and 0.29 based on the three precipitation datasets, respectively.

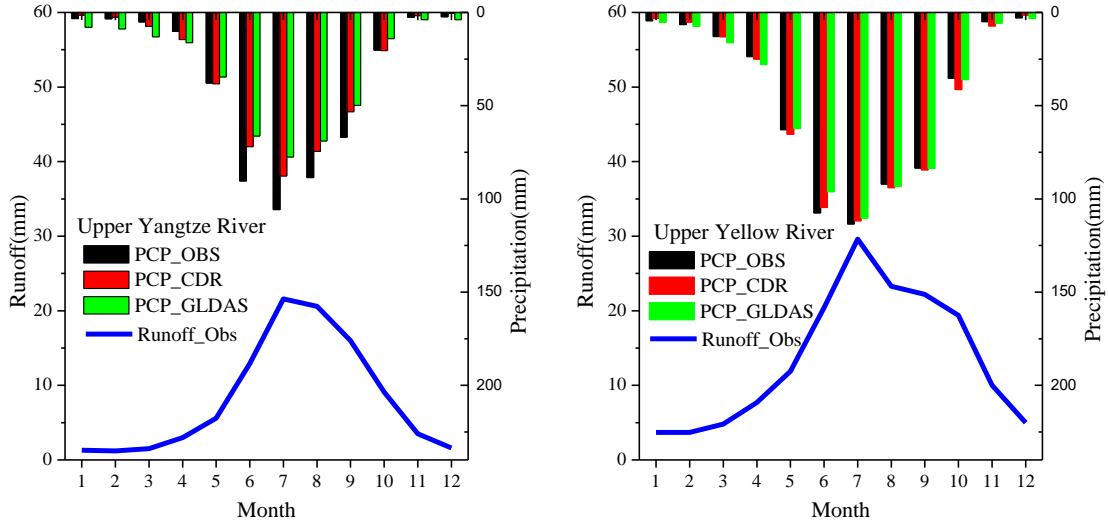

Figure 2. The monthly average runoff observed at the river outlet of the upper Yangtze River and Yellow River Basin, and the precipitation data retrieved from ground-based observation, GLDAS and PERSIANN-CDR product.

### 3.2 Comparison between gauge-based precipitation, GLDAS precipitation and PERSIANN-CDR precipitation

Figure 3 shows the spatial distribution of average annual values of 1.0-degree-resolution GLDAS precipitation and 0.25-degree-resolution PERSIANN-CDR precipitation. The spatial patterns of the two dataset are generally consistent with each other. Figure 4 shows the comparison of CDFs for basin-averaged daily gauge-based precipitation, GLDAS precipitation and PERSIANN-CDR precipitation in the UYZR and UYLR from 1983 to 2012. At a given probability, GLDAS precipitation generally has the smallest values, followed by PERSIANN-CDR precipitation and gauge-based precipitation in the UYZR. In the UYLR, the CDFs of PERSIANN-CDR precipitation, GLDAS precipitation and gauge-based precipitation show overall better agreement than that in the UYZR. Table 2 shows the average amounts

of gauge-based precipitation, [GLDAS precipitation](#) and PERSIANN-CDR precipitation. In the UYZR, the average annual precipitation is 436.4 mm from gauge-based data, [365.1 mm from GLDAS dataset](#) and 374.3 mm from PERSIANN-CDR product. Gauge-based annual precipitation is 16.6% larger than PERSIANN-CDR annual precipitation. In the UYLR, average annual amounts of gauge-based precipitation, [GLDAS precipitation](#) and PERSIANN-CDR precipitation are similar, which are 550.2, 547.9 and 556.6 mm, respectively (Table 2).

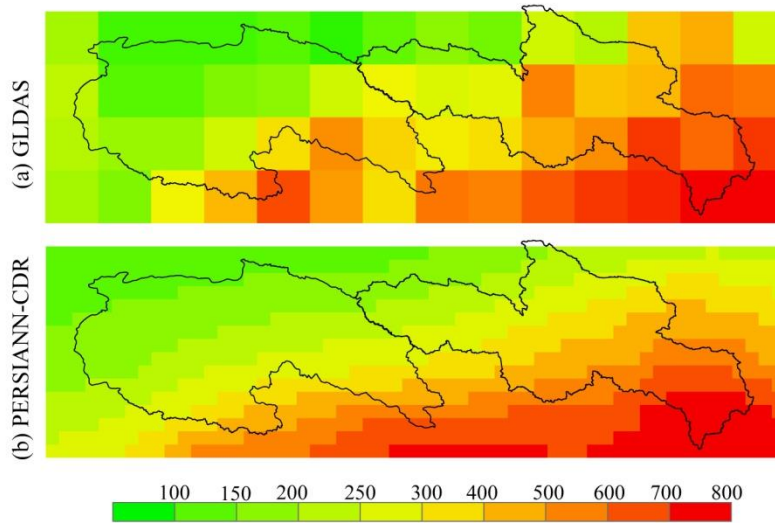

Figure 3. The spatial distribution of average annual values of 1.0-degree-resolution GLDAS precipitation (a) and 0.25-degree-resolution PERSIANN-CDR precipitation (b).

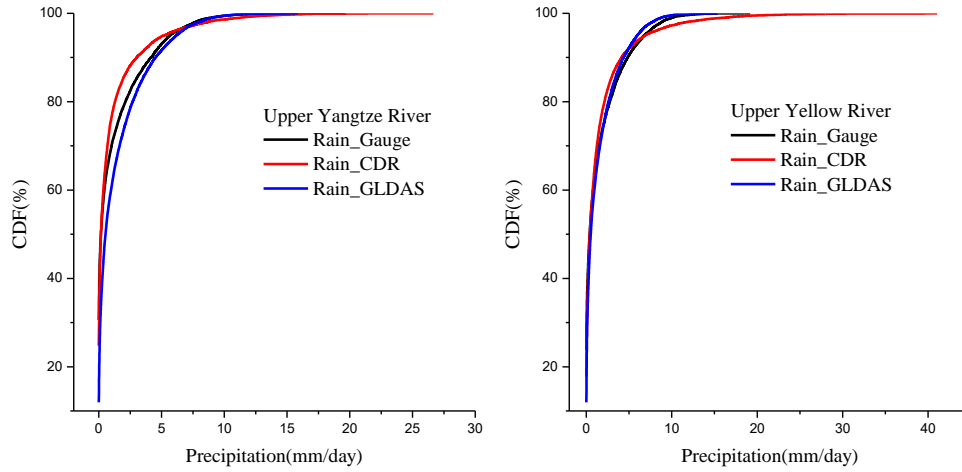

Figure 4. The calculated CDF of daily gauge-based precipitation, [GLDAS precipitation](#) and PERSIANN-CDR precipitation in the upper Yangtze River Basin and upper Yellow River Basin.

Table 2 Average monthly precipitation and runoff in the upper Yangtze and Yellow River basins

| Period      | Upper Yangtze River |                                 |              |                | Upper Yellow River |                                 |              |                |
|-------------|---------------------|---------------------------------|--------------|----------------|--------------------|---------------------------------|--------------|----------------|
|             | Rain_<br>Gauge      | <a href="#">Rain_<br/>GLDAS</a> | Rain_<br>CDR | Runoff_<br>OBS | Rain_<br>Gauge     | <a href="#">Rain_<br/>GLDAS</a> | Rain_<br>CDR | Runoff_<br>OBS |
| Jan.        | 3.3                 | 4.0                             | 1.4          | 1.3            | 4.4                | 5.3                             | 3.2          | 3.7            |
| Feb.        | 3.4                 | 4.8                             | 2.5          | 1.2            | 6.5                | 7.5                             | 5.2          | 3.7            |
| Mar.        | 5.0                 | 8.1                             | 7.5          | 1.5            | 12.9               | 16.2                            | 13.1         | 4.8            |
| Apr.        | 10.2                | 16.2                            | 14.6         | 3.0            | 23.7               | 28.0                            | 25.0         | 7.7            |
| May         | 37.9                | 34.6                            | 38.2         | 5.6            | 62.9               | 62.3                            | 65.3         | 11.9           |
| Jun.        | 90.4                | 66.3                            | 72.0         | 12.9           | 107.6              | 96.2                            | 104.6        | 20.4           |
| Jul.        | 105.8               | 87.6                            | 87.8         | 21.6           | 113.5              | 110.3                           | 111.8        | 29.6           |
| Aug.        | 88.6                | 69.0                            | 74.5         | 20.6           | 92.0               | 93.3                            | 94.0         | 23.3           |
| Sep.        | 66.9                | 49.8                            | 53.2         | 16.0           | 83.4               | 83.7                            | 84.4         | 22.2           |
| Oct.        | 20.2                | 18.0                            | 20.5         | 9.1            | 35.3               | 36.0                            | 41.4         | 19.4           |
| Nov.        | 2.5                 | 3.9                             | 1.7          | 3.5            | 5.0                | 5.8                             | 7.3          | 10.0           |
| Dec.        | 2.3                 | 2.0                             | 0.5          | 1.6            | 3.0                | 3.3                             | 1.5          | 5.0            |
| May to Oct. | 409.7               | 325.3                           | 346.1        | 85.8           | 494.6              | 481.8                           | 501.4        | 126.8          |
| Annual      | 436.4               | 364.3                           | 374.3        | 98.0           | 550.2              | 547.9                           | 556.6        | 161.8          |
| Ratio       | 93.9                | 89.3                            | 92.5         | 87.6           | 89.9               | 87.9                            | 90.1         | 78.4           |



*Note: Rain\_Gauge, Rain\_GLDAS and Rain\_CDR indicate gauge-based precipitation GLDAS precipitation and PERSIANN-CDR precipitation (mm), respectively. Runoff\_OBS indicates observed runoff (mm). Ratio means the percentage of precipitation and streamflow during May to November to annual values.*

### **3.3 Streamflow Simulation in the two basins**

Due to the previous mentioned concern that sparse gauge-network and its interpolation cannot perfectly describe the spatial and temporal rainfall characteristics at river basin scale, the alternative is to evaluate streamflow simulated instead of treating sparse gauge-network as reference. In this section, the streamflow simulated by gauge-based precipitation, GLDAS precipitation and PERSIANN-CDR precipitation are derived from HIMS, and compared with observed streamflow at the outlet in the UYZR and UYLR. The HIMS model is separately calibrated by maximizing the *NSE* between observed streamflow and simulated streamflow driven by gauge-based precipitation, GLDAS precipitation and PERSIANN-CDR precipitation from 1983 to 1997. Table 3 shows the calibrated parameter values of the HIMS model for the two basins. Figure 5 shows daily observed streamflow and simulated streamflow driven by gauge-based precipitation, GLDAS precipitation and PERSIANN-CDR precipitation for the two basins from 1983 to 2012. In the UYZR (Figure 5 a, b and c), the *NSE* values are 0.63, 0.78 and 0.77 in the calibration period driven by gauge-based precipitation, GLDAS precipitation and PERSIANN-CDR precipitation respectively, while they are 0.60, 0.71 and 0.73 in the verification period, respectively. In both calibration and verification period, the *NSE* values from GLDAS precipitation and PERSIANN-CDR precipitation are greater than that from gauge-based precipitation, which indicates that using GLDAS precipitation and PERSIANN-CDR precipitation as input to HIMS model is able to

generate more accurate streamflow than using gauge-based precipitation in the UYZR. In the UYLR (Figure 5 d, e and f), the *NSE* values between daily observed streamflow and simulated streamflow are 0.82, 0.78 and 0.80 in the calibration period driven by gauge-based precipitation, **GLDAS precipitation** and PERSIANN-CDR precipitation, respectively. In the verification period, the *NSE* values are 0.81, 0.77 and 0.78 for the three types of data, respectively. The high *NSE* value in both calibration and verification periods suggest that gauge-based precipitation, **GLDAS precipitation** and PERSIANN-CDR precipitation have similar performances as the drivers of streamflow simulation in the UYLR.

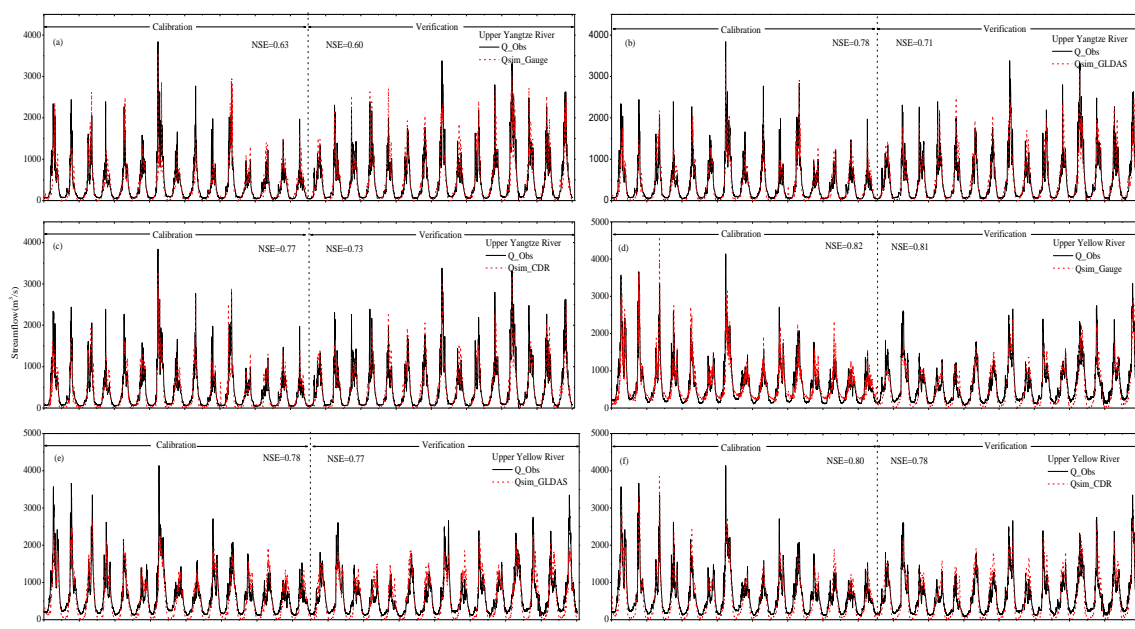

Figure 5. The comparison between the simulated daily streamflow (red) with ground-based, GLDAS and PERSIANN-CDR precipitation and the observed data (black) at the outlets of the upper Yangtze River Basin (a, b and c) and upper Yellow River Basin (d, e and f).

Table 3 Calibrated parameter values in the HIMS model for the upper Yangtze and

338 Yellow River basins.

| Basin   | input        | <i>SMSC</i> | <i>R</i> | <i>r</i> | <i>L<sub>a</sub></i> | <i>R<sub>c</sub></i> | <i>C</i> | <i>K<sub>b</sub></i> | <i>C<sub>1</sub></i> | <i>C<sub>2</sub></i> |
|---------|--------------|-------------|----------|----------|----------------------|----------------------|----------|----------------------|----------------------|----------------------|
| Yangtze | Gauge_based  | 302.5       | 1.47     | 0.78     | 0.74                 | 0.05                 | 0.67     | 0.15                 | 0.18                 | 0.81                 |
|         | GLDAS        | 339.2       | 1.72     | 0.87     | 0.82                 | 0.07                 | 0.58     | 0.18                 | 0.17                 | 0.81                 |
|         | PERSIANN-CDR | 343.8       | 1.71     | 0.89     | 0.87                 | 0.07                 | 0.56     | 0.18                 | 0.17                 | 0.82                 |
| Yellow  | Gauge_based  | 334.8       | 2.08     | 0.77     | 1.00                 | 0.03                 | 0.44     | 0.14                 | 0.14                 | 0.86                 |
|         | GLDAS        | 332.5       | 2.10     | 0.76     | 1.02                 | 0.03                 | 0.39     | 0.14                 | 0.15                 | 0.85                 |
|         | PERSIANN-CDR | 342.1       | 2.01     | 0.73     | 0.98                 | 0.05                 | 0.45     | 0.14                 | 0.12                 | 0.88                 |

339

340 Figure 6 and Table 4 compare the simulated and observed average monthly  
341 streamflow for the two basins. In the UYZR, the relative bias between observed  
342 streamflow and simulated streamflow driven by gauge-based precipitation is 10.3% in  
343 wet season, which suggests a considerable overestimate of streamflow. Comparably, the  
344 relative bias between observed streamflow and simulated streamflow driven by GLDAS  
345 precipitation and PERSIANN-CDR precipitation is -1.5% and 0.5% in wet season,  
346 respectively. As compared with the wet season streamflow simulation results with  
347 gauge-based precipitation, the simulated streamflows driven by GLDAS precipitation and  
348 PERSIANN-CDR precipitation are closer to the observed streamflow. In dry season,  
349 streamflow simulations driven by gauge-based precipitation, GLDAS precipitation and  
350 PERSIANN-CDR precipitation both underestimate streamflow with relative bias of  
351 -22.1%, -20.1% and -28.0% in the UYZR, respectively. In the UYLR, all the three  
352 precipitation products slightly overestimate the streamflow in wet season with relative  
353 bias of 2.6%, 1.8% and 2.9%, respectively. Similar to the results in the UYZR,  
354 streamflow simulations driven by gauge-based precipitation, GLDAS precipitation and  
355 PERSIANN-CDR precipitation have similar good performances in wet season in the  
356 UYLR. However, all the three precipitation products tend to produce smaller streamflow

in dry season with relative bias of -33.1%, -26.9% and -27.6%, respectively. One of the reasons that gauge-based precipitation, GLDAS precipitation and PERSIANN-CDR precipitation generate smaller streamflow in dry season is the lack of complex method or proper algorithm in the HIMS model to handle frozen soil. In dry season, when the amounts of precipitation and streamflow are small, streamflow melted from frozen soil can account for a significant proportion of total streamflow. In other words, the frozen soil melt could significantly influence the streamflow simulation results. The relative high bias of observed streamflow and simulated streamflow from all the three precipitation products could be due to the lack of proper modeling component in the HIMS hydrologic model that quantifies the frozen soil melting effects in dry season. However, the bias between simulated and observed streamflow is much smaller in wet season, when precipitation and streamflow are relatively large and streamflow melted from frozen soil accounts for a limited proportion in total streamflow.

Table 4. The performances of streamflow simulations driven by gauge-based precipitation, GLDAS precipitation and PERSIANN-CDR precipitation in the two basins

| Period | Upper Yangtze River |          |          |        |          |          |        | Upper Yellow River |          |          |        |          |          |        |
|--------|---------------------|----------|----------|--------|----------|----------|--------|--------------------|----------|----------|--------|----------|----------|--------|
|        | Q_obs               | Qs_gauge | Qs_GLDAS | Qs_CDR | Rb_gauge | Rb_GLDAS | Rb_CDR | Q_obs              | Qs_gauge | Qs_GLDAS | Qs_CDR | Rb_gauge | Rb_GLDAS | Rb_CDR |
| Jan.   | 68.1                | 48.4     | 40.4     | 32.8   | -28.9    | -40.7    | -51.8  | 168.9              | 65.7     | 71.4     | 68.0   | -61.1    | -57.7    | -59.8  |
| Feb.   | 68.3                | 32.7     | 30.2     | 24.9   | -52.1    | -55.8    | -63.5  | 168.3              | 61.6     | 67.6     | 60.5   | -63.4    | -59.8    | -64.1  |
| Mar.   | 76.9                | 70.2     | 75.3     | 72.4   | -8.7     | -2.1     | -5.8   | 219.7              | 110.5    | 145.1    | 138.0  | -49.7    | -34.0    | -37.2  |
| Apr.   | 158.6               | 153.2    | 158.3    | 147.5  | -3.4     | -0.2     | -7.0   | 352.0              | 299.0    | 311.5    | 302.5  | -15.1    | -11.5    | -14.0  |
| May    | 289.2               | 253.5    | 262.1    | 273.4  | -12.3    | -9.4     | -5.5   | 543.6              | 512.9    | 514.9    | 524.9  | -5.7     | -5.3     | -3.4   |
| Jun.   | 683.9               | 750.5    | 679.1    | 698.4  | 9.7      | -0.7     | 2.1    | 928.5              | 968.6    | 921.3    | 946.6  | 4.3      | -0.8     | 1.9    |
| Jul.   | 1108.9              | 1306.9   | 1102.5   | 1111.4 | 17.9     | -0.6     | 0.2    | 1350.1             | 1386.6   | 1420.2   | 1431.3 | 2.7      | 5.2      | 6.0    |
| Aug.   | 1059.7              | 1204.0   | 1042.8   | 1063.2 | 13.6     | -1.6     | 0.3    | 1061.1             | 1141.4   | 1102.7   | 1088.5 | 7.6      | 3.9      | 2.6    |
| Sep.   | 850.7               | 977.4    | 897.2    | 918.9  | 14.9     | 5.5      | 8.0    | 1009.6             | 1059.7   | 1062.6   | 1075.7 | 5.0      | 5.2      | 6.5    |
| Oct.   | 469.4               | 428.1    | 407.2    | 420.1  | -8.8     | -13.3    | -10.5  | 883.7              | 859.1    | 861.3    | 876.5  | -2.8     | -2.5     | -0.8   |
| Nov.   | 187.6               | 169.0    | 182.3    | 161.1  | -9.9     | -2.8     | -14.1  | 457.3              | 429.1    | 437.8    | 456.6  | -6.2     | -4.3     | -0.2   |

|           |       |       |       |       |       |       |       |       |       |       |       |       |       |       |
|-----------|-------|-------|-------|-------|-------|-------|-------|-------|-------|-------|-------|-------|-------|-------|
| Dec.      | 84.5  | 28.2  | 27.5  | 24.5  | -66.7 | -67.5 | -71.0 | 227.0 | 100.7 | 132.8 | 127.5 | -55.7 | -41.5 | -43.9 |
| May-Oct.  | 743.4 | 819.6 | 731.9 | 746.9 | 10.3  | -1.5  | 0.5   | 962.7 | 987.7 | 980.5 | 990.4 | 2.6   | 1.8   | 2.9   |
| Nov.-Apr. | 107.2 | 83.6  | 85.6  | 77.2  | -22.1 | -20.1 | -28.0 | 265.6 | 177.6 | 194.2 | 192.3 | -33.1 | -26.9 | -27.6 |
| Annual    | 427.9 | 454.6 | 408.7 | 414.8 | 6.2   | -4.5  | -3.1  | 617.0 | 586.0 | 587.8 | 594.6 | -5.0  | -4.7  | -3.6  |

Note:  $Q_{obs}$  indicates observed runoff ( $m^3/s$ ).  $Qs_{gauge}$ ,  $Qs_{GLDAS}$  and  $Qs_{CDR}$  indicate streamflow simulations ( $m^3/s$ ) driven by the gauge-based precipitation, GLDAS precipitation and PERSIANN-CDR precipitation, respectively.  $Rb_{gauge}$ ,  $Rb_{GLDAS}$  and  $Rb_{CDR}$  indicate relative bias between observed streamflow and simulated streamflow driven by the gauge-based precipitation, GLDAS precipitation and PERSIANN-CDR precipitation, respectively.

In summary, the streamflow simulated by GLDAS precipitation and PERSIANN-CDR precipitation has a good agreement with the observed streamflow in the UYZR and UYLR. The good agreement between observed streamflow and PERSIANN-CDR simulated streamflow reveals a strong streamflow simulation capability of PERSIANN-CDR product, which also gives community certain confidence in using PERSIANN-CDR product to study hydrological cycle and climate change on the Tibetan Plateau.

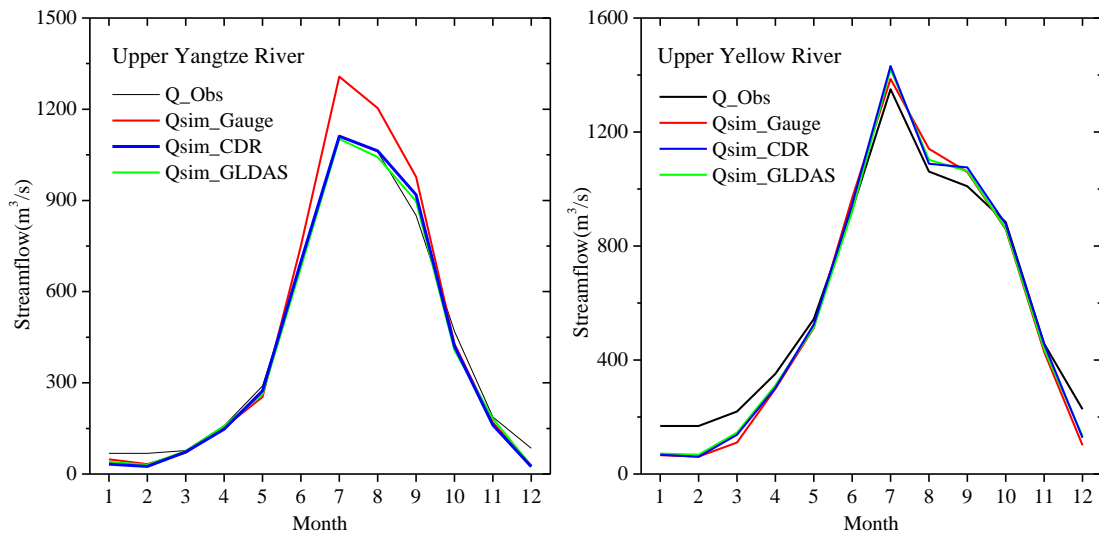

Figure 6. The comparison between the observed streamflow (black) and the simulated streamflow using ground-based precipitation (red), GLDAS precipitation (green) and PERSIANN-CDR precipitation (blue) in the upper Yangtze River Basin and upper Yellow River Basin.

## 4. Discussions

### 4.1 Parameter uncertainties of hydrological modeling

In this study, model parameters are separately calibrated in terms of highest *NSE* between observed streamflow and simulated streamflow driven by gauge-based precipitation, GLDAS precipitation and PERSIANN-CDR precipitation. Therefore, these parameter values are highly dependent on the precipitation inputs. When the precipitation input changes, the parameter values may change accordingly in order to match the streamflow. Table 3 shows the values of calibrated parameters separately driven by gauge-based precipitation, GLDAS precipitation and PERSIANN-CDR precipitation in the two basins. Parameter sensitivity study of the HIMS model indicates that the HIMS model is most sensitive to parameters of the maximum soil storage capacity (*SMSC*) and the infiltration coefficients (*R* and *r*) (Jiang et al., 2015). In the UYLR, the parameters calibrated by the inputs of gauge-based precipitation, GLDAS precipitation and PERSIANN-CDR precipitation generally have similar values. However, in the UYZR, *SMSC*, *R* and *r* values calibrated from gauge-based precipitation are 302.46, 1.47 and 0.78 respectively, while *SMSC*, *R* and *r* values calibrated from PERSIANN-CDR precipitation are 343.80, 1.71 and 0.89 respectively. By separately calibrating the HIMS parameters, the gauge-based precipitation, GLDAS precipitation and PERSIANN-CDR

give different optimal parameter values. Thus, the streamflow simulation bias using gauge-based precipitation, GLDAS precipitation and PERSIANN-CDR are the joint results of parameter differences and model input bias. Correspondingly, soil moisture and evapotranspiration estimation could be different using various precipitation forcings and calibrated parameters. However, the main purpose of this study is evaluating the streamflow simulation capability of satellite-based precipitation and gauge-based precipitation as inputs to a hydrologic model over the Tibetan Plateau. Therefore, in spite of the influence of cancellation between parameter differences and precipitation bias on streamflow simulation, it does not harm the conclusion that both PERSIANN-CDR and GLDAS precipitation is able to produce a reasonably good streamflow in the two river basins on the Tibetan Plateau.

In previous study, Tong et al. (2014) evaluated the streamflow simulation capabilities of four satellite-based precipitation products (TRMM-3B42-V7, TRMM-3B42RT-V7, PERSIANN and CMORPH) using the VIC hydrologic model in the UYZR and UYLR from 2006 to 2012. Different from the PERSIANN product that Tong et al. (2014) used, PERSIANN-CDR is a different product that provides over 33 years of daily and high resolution precipitation with GPCP monthly information incorporated. In addition, the parameters in the VIC hydrologic model are calibrated by the input of interpolated gauge-based precipitation. The calibrated parameter values are then kept fixed when the VIC model are rerun by inputs of satellite-based precipitation datasets to evaluate the streamflow simulation capabilities of satellite-based precipitation datasets. Rerunning the hydrologic model with the fixed parameters calibrated by gauge-based precipitation partly indicates that Tong et al. (2014) assumed that the sparse gauge

observations a more reliable dataset than satellite-based precipitation datasets. However, this is a questionable assumption. As we mentioned in the introduction, not only because the location of rain-gauges is conditioned (relatively low elevations), but also the sparse distribution of rainfall stations over the Tibetan Plateau could bring large errors and uncertainties in regional rainfall measurement. Similar arguments are also raised by Miao et al. (2015). In this study, we rather cautiously believe that gauge-based precipitation could not be reliable, especially in the UYZR where there is only one station per 34426 km<sup>2</sup> (nearly 1°×3° spatial resolution). Therefore, separately calibrating hydrologic model by the inputs of different precipitation datasets instead of using identical parameters will contribute to fairer comparisons when evaluating streamflow simulation capabilities of different precipitation datasets, though other hydrological variables such as soil moisture and evapotranspiration could be incorrectly estimated by different precipitation inputs and calibrated parameters.

#### **4.2 The influences of precipitation record length on streamflow simulation capability**

Besides of the uncertainties due to hydrological model calibration, another factor that influences the accuracy of streamflow simulation is the length of precipitation records used for calibration. As mentioned before, one of the advantages of PERSIANN-CDR product is the provision of more than 33 years of continuous sequences of precipitation data, which can allow more extensive streamflow simulation in the Tibetan Plateau. In this study, comparison experiments (Figure 7) were designed to test the influences of precipitation record length on the accuracy of streamflow simulation. In the designed experiments, we investigate the accuracy of streamflow simulation during



2008 to 2012 with two different calibration scenarios. In the first scenario, the calibration period is from 2003 to 2007 for both the UYZR (Figure 7a) and the UYLR (Figure 7b). In the second scenario (Figure 7c and 7d), 15 years of data from 1983 to 1997 is used for calibration, which is longer than that in the first scenario. As it is shown in Figure 7 (a and b), in the first scenario the *NSE* values between daily observed and simulated streamflow are 0.75 and 0.66 during the verification period (from 2008 to 2012) for the UYZR and UYLR, respectively. Comparatively, in the second scenario the *NSE* values during the verification period (from 2008 to 2012) are 0.81 and 0.82 for the two basins, respectively. The *NSE* values in the second scenario are consistently higher than that in the first scenario in the two basins. For the UYLR in the second scenario (Figure 7d), the *NSE* value during the verification period is significantly greater than that in the first scenario. Figure 7(b) also shows that the HIMS hydrological model significantly underestimates the flow peaks during the summer of 2010 and 2012 when calibrated by 5 years of data from 2003 to 2007. The disagreement between the observed and simulated flow peaks is partly because the magnitudes of flood events during the calibration period are all smaller than that during the verification period and the HIMS hydrological model cannot be well trained during the calibration period. Therefore, when using a short length precipitation data as input for a hydrological model, the accuracy of streamflow simulation could be limited, especially when precipitation data used for calibration cannot cover the flood and drought conditions of a basin. However, when the HIMS hydrological model is calibrated by the longer dataset from 1983 to 1997 as it is shown in Figures 7c and d, there is a greater potential that the characteristics of extreme events can be captured by the hydrological model than only using 5 years of data from 2003 to 2007.

Given the availability of long-term precipitation records (over 33 years) provided by PERSIANN-CDR product, the extreme events in the historical period could be well captured by a hydrological model. Therefore, using such a product with long-term records, the confidence of simulating streamflow over the Tibetan Plateau will correspondingly increase.

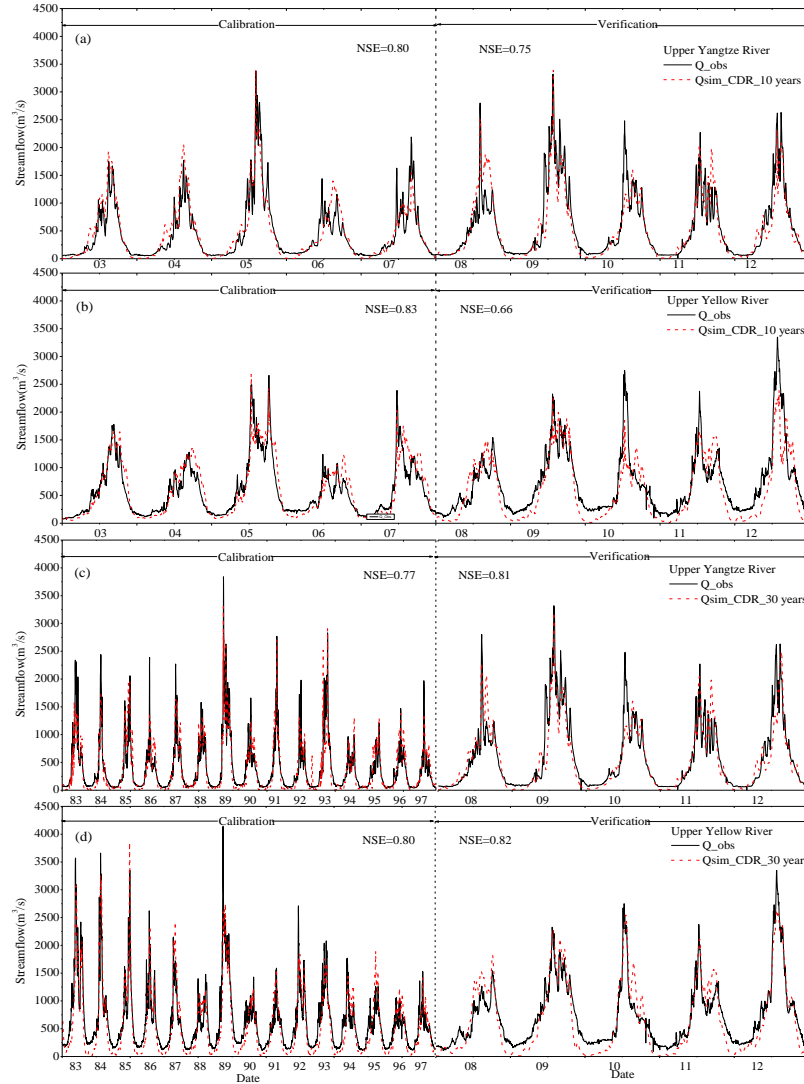

Figure 7. The simulated daily streamflow (red) forced by PERSIANN-CDR rainfall product in different scenarios and the observed daily streamflow (black) at the outlets of the upper Yangtze River Basin and upper Yellow River Basin. (a) and (b) is the scenario

that the period 2003 to 2007 is used for calibration and 2008 to 2012 for verification. (c) and (d) is the scenario that the period 1983 to 1997 is used for calibration and 2008 to 2012 for verification.

## 5. Summary

As it is compared to radar-based precipitation measurement and gauge networks, the main advantage of satellite-based precipitation estimate is the broader coverage at global scale. This allows a comprehensive understanding of the driving force of hydrologic cycle, especially for the gauge sparse area. To verify the accuracy of satellite-based precipitation estimate products, the comparison with ground observation is necessary. However, in gauge sparse area, a direct comparison on precipitation temporal and spatial variation will be arguable due to the limited gauge information. This study provides an alternative way to evaluate satellite-based precipitation products by forcing both rainfall estimates from satellite and limited gauge network into hydrological model. Given the confidence in streamflow measurements, which are more reliable and well monitored than the limited ground-based rainfall measurements, the comparison of simulated streamflow enables an indirect way to evaluate satellite-based precipitation products.

In this study, PERSIANN-CDR precipitation, [GLDAS precipitation](#) and gauge-based precipitation have good agreements in the UYLR, while the three datasets have different values in the UYZR. Streamflow simulation capabilities of PERSIANN-CDR precipitation, [GLDAS precipitation](#) and gauge-based precipitation are evaluated as the inputs of the HIMS hydrologic model in the two basins. Both the three datasets have similar good performances in the UYLR, while PERSIANN-CDR precipitation and [GLDAS precipitation](#) has slightly better performance than gauge-based

precipitation in the UYZR. Gauge-based precipitation tends to produce larger streamflow in wet season in the UYZR. This indicates that in the UYZR, a sparse gauge network could be not fully reliable to be used as the reference for streamflow simulation due to the fact that the locations of the limited gauge stations cannot be representative for measuring the precipitation patterns at the river basin scale. In addition, gauge-based precipitation, GLDAS precipitation and PERSIANN-CDR precipitation all generate smaller streamflow in dry season probably because of lack of frozen soil algorithm in HIMS model. This may bring certain uncertainties in the discharge comparisons by different precipitation inputs (Xue et al., 2013b). Further studies should be conducted to improve the frozen soil simulation of HIMS model.

Lack of rainfall gauge stations has brought great challenge to hydrological and climate studies over the Tibetan Plateau (e.g., Yao et al., 2012; Zhang et al., 2013). Based on the demonstration in this study that PERSIANN-CDR is able to produce reasonably good streamflow in the UYZR and UYLR as compared to observed streamflow, we can speculated that PERSIANN-CDR rainfall product as the potential to be a useful dataset and alternative for sparse gauge network for climate change and hydrological studies on the Tibetan Plateau considering the needs for long-term (more than 33 years) and high resolution records.

## **Acknowledgements**

This research was supported by the Natural Science Foundation of China (41330529, 41571024, 41201034), the program for “Bingwei” Excellent Talents in Institute of Geographic Sciences and Natural Resources Research, CAS (Project No.2013RC202), the NOAA NCDC/Climate Data Record program (Prime Award NA09NES440006) and

the DOE (Prime Award # DE-IA0000018).

## Reference

- Adler, R.F., Huffman, G.J., Chang, A., Ferraro, R., Xie, P., Janowiak, J., Rudolf, B., Schneider, U., Curtis, S., Bolvin, D., Gruber, A., Susskind, J., Arkin, P., Nelkin, E., 2003. The version-2 global precipitation climatology project (GPCP) monthly precipitation analysis (1979-present). *J. Hydrometeorol.* 4, 1147 – 1167.
- Ashouri, H., and Coauthors, 2015: PERSIANN-CDR: Daily precipitation climate data record from multisatellite observations for hydrological and climate studies. *Bull. Amer. Meteor. Soc.*,96, 69–83, doi:10.1175/BAMS-D-13-00068.1.
- Artan, G., Gadain, H., Smith, J.L., Bandaragoda, C.J., Verdin, J.P., 2007. Adequacy of satellite derived rainfall data for stream flow modeling. *Nat. Hazards* 43 (2),167 – 185.
- Bitew, M.M., Gebremichael, M., Ghebremichael, L.T., Bayissa, Y.A., 2012. Evaluation of high-resolution satellite rainfall products through streamflow simulation in a hydrological modeling of a small mountainous watershed in Ethiopia. *J. Hydrometeorol.* 13 (1), 338 – 350.
- Duan, Q., Sorooshian, S., & Gupta, V. (1992). Effective and efficient global optimization for conceptual rainfall-runoff models. *Water Resour. Res.*, 28(4), 1015-1031.
- Franchini, M., Lamberti, P., 1994. A flood routing Muskingum type simulation and forecasting model based on level data alone,. *Water Resour. Res.* 30 (7),2183e2196.
- Garcia, M., Peters-Lidard, C.D., Goodrich, D.C., 2008. Spatial interpolation of precipitation in a dense gauge network for monsoon storm events in the southwestern United States. *Water Resour. Res.* 44, W05S13,

559 <http://dx.doi.org/10.1029/2006WR005788>

560 Gottschalck, J., J. Meng, M. Rodell, and P. Houser (2005), Analysis of multiple  
561 precipitation products and preliminary assessment of their impact on global land  
562 data assimilation system land surface states, *J. Hydrometeorol.*, 6(5), 573-598.  
563 [doi:10.1175/JHM437.1](https://doi.org/10.1175/JHM437.1).

564 Hargreaves, G.H. and Samani, Z.A., 1985. Reference crop evapotranspiration from  
565 temperature. *Appl. Eng. Agric.* 1 (1), 96-99.

566 Huffman, G. J., and Coauthors, 1997: The Global Precipitation Climatology Project  
567 (GPCP) combined precipitation dataset. *Bull. Amer. Meteor. Soc.*, 78, 5–20,  
568 [doi:10.1175/1520-0477\(1997\)078,0005:TGPCPG.2.0.CO;2](https://doi.org/10.1175/1520-0477(1997)078<0005:TGPCPG.2.0.CO;2).

569 Hock, R. (2003), Temperature index melt modelling in mountain areas, *J. Hydrol.*,  
570 282(1–4), 104–115, [doi:10.1016/S0022-1694\(03\)00257-9](https://doi.org/10.1016/S0022-1694(03)00257-9).

571 Liu, C.M., Zheng, H.X., Wang, Z.G., et al., 2006. Distributed Simulation of Catchment  
572 Water Cycle. Yellow River Conservancy Press, Zhengzhou, China.

573 Liu, C.M., Wang, Z.G., Zheng, H.X., Zhang, L., Wu, X.F., 2008. Development  
574 and application of HIMS system. *Sci. China (E)* 38 (3), 350e360.

575 Liu, C.M., Wang, Z.G., Yang, S.T., Zheng, H.X., 2010a. Research progress of water cycle  
576 integrated simulation system (HIMS). *Water Resour. Dev. Res.* 8 (3), 5e15 (in  
577 Chinese).

578 Liu, C.M., Zheng, H.X., Wang, Z.G., Yang, S.T., 2010b. Multi-Scale integrated  
579 simulation of hydrological processes using HIMS with verified case studies. *J.*  
580 *Beijing Norm. Univ. Nat. Sci.* 46 (3), 268e273 (in Chinese).

581 Ly, S., Charles, C., Degre, A., 2011. Geostatistical interpolation of daily rainfall at

582 catchment scale: the use of several variogram models in the Ourthe and Ambleve  
583 catchments, Belgium. *Hydrol. Earth Syst. Sci.* 15, 2259 – 2274.

584 Joyce, R.J., Janowiak, J.E., Arkin, P.A., Xie, P., 2004. CMORPH: a method that produces  
585 global precipitation estimates from passive microwave and infrared data at high  
586 spatial and temporal resolution. *J. Hydrometeorol.* 5 (3), 487 – 503

587 Kidd, C. and Levizzani, V., 2011. Status of satellite precipitation retrievals. *Hydrol. Earth*  
588 *Syst. Sci.* 15, 1109 – 1116.

589 Miao, C., H. Ashouri, K.-L. Hsu, S. Sorooshian, and Q. Duan, 2015, Evaluation of the  
590 PERSIANN-CDR daily rainfall estimates in capturing the behavior of extreme  
591 precipitation events over China, *J. Hydrometeorol.*, doi:10.1175/JHM-D-14-0174.1.

592 Nalder, I.A., Wein, R.W., 1998. Spatial interpolation of climatic normals: test of a new  
593 method in the Canadian boreal forest. *Agr. For. Meteorol.* 92 (4), 211 – 225.

594 Rodell, M., P. R. Houser, U. E. A. Jambor, and J. Gottschalck (2004), The global land  
595 data assimilation system, *Bull. Am. Meteorol. Soc.*, 85(3), 381-394.  
596 doi:10.1175/BAMS-85-3-381

597 Sheffield, J., et al. (2014), A drought monitoring and forecasting system for sub-Sahara  
598 African water resources and food security, *Bull. Amer. Meteor. Soc.*, 95, 861-882, doi:  
599 10.1175/BAMS-D-12-00124.1.

600 Su, F., Gao, H., Huffman, G.J., Lettenmaier, D.P., 2011. Potential utility of the real time  
601 TMPA-RT precipitation estimates in Streamflow prediction. *J. Hydrometeorol.* 12,  
602 444 – 455.

603 Sorooshian, S., Hsu, K.-L., Gao, X., Gupta, H.V., Imam, B., Braithwaite, D.,  
604 2000. Evaluation of PERSIANN system satellite-based estimates of tropical rainfall.

605 *Bull. Am. Meteorol. Soc.* 81 (9), 2035 – 2046.

606 Sorooshian, S., and Coauthors, 2011: Advancing the remote sensing of precipitation. *Bull.*  
607 *Amer. Meteor. Soc.*, 92, 1271–1272, doi:10.1175/BAMS-D-11-00116.1.

608 Thom, H. C. S. (1958), A note on the gamma distribution, *Mon. Wea. Rev.*, 86, 117-122,  
609 doi:10.1175/1520-0493(1958)086<0117:ANOTGD>2.0.CO;2.

610 Tong, K., F. Su, D. Yang, and Z. Hao, 2014: Evaluation of satellite precipitation retrievals  
611 and their potential utilities in hydrologic modeling over the Tibetan Plateau. *J.*  
612 *Hydrol.*, 519, 423–437, doi:10.1016/j.jhydrol.2014.07.044.

613 Turk, F.J., Miller, S.D., 2005. Toward improved characterization of remotely sensed  
614 precipitation regimes with MODIS/AMSR-E blended data techniques. *IEEE Trans.*  
615 *Geosci. Rem. Sens.* 43 (5), 1059 – 1069.

616 Wang, F., L. Wang, T. Koike, H. Zhou, K. Yang, A. Wang, and W. Li (2011), Evaluation  
617 and application of a fine-resolution global data set in a semiarid mesoscale river  
618 basin with a distributed biosphere hydrological model, *J. Geophys. Res. Atmos.*, 116  
619 (D21). doi:10.1029/2011JD015990

620 Xie, P. P., J. E. Janowiak, P. A. Arkin, R. Adler, A. Gruber, R. Ferraro, G. J. Huffman, and  
621 S. Curtis, 2003: GPCP Pentad precipitation analyses: An experimental dataset based  
622 on gauge observations and satellite estimates. *J. Climate*, 16,  
623 2197–2214, doi:10.1175/2769.1

624 Xue, B. L., Wang, L., Li, X., Yang, K., Chen, D., & Sun, L. (2013a). Evaluation of  
625 evapotranspiration estimates for two river basins on the Tibetan Plateau by a water  
626 balance method. *J. Hydrol.*, 492, 290-297.

627 Xue B. L., L. Wang, K. Yang, L. Tian, J. Qin, Y. Chen, L. Zhao, Y. Ma, T. Koike, Z. Hu,



and X.-P. Li (2013b), Modeling the land surface water and energy cycle of a mesoscale watershed in the central Tibetan Plateau with a distributed hydrological model, *J. Geophys. Res. Atmos.*, 118, 8857 – 8868, doi:10.1002/jgrd.50696

Yilmaz, K.K., Hogue, T.S., Hsu, K.-L., Sorooshian, S., 2005. Intercomparison of rain gauge, radar, and satellite-based precipitation estimates with emphasis on hydrologic forecasting. *J. Hydrometeorol.* 6 (4), 497 – 517.

Yong, B., Ren, L., Hong, Y., Wang, J., Gourley, J., Jiang, S., Chen, X., Wang, W., 2012. Assessment of evolving TRMM-based multisatellite real-time precipitation estimation methods and their impacts on hydrologic prediction in a high latitude basin. *J. Geophys. Res.* 117, D09108, <http://dx.doi.org/10.1029/2011JD017069>.

Yao, T. D., et al. (2012), Different glacier status with atmospheric circulations in Tibetan Plateau and surroundings, *Nat. Clim. Change*, 2(9), 663–667.

Zhang, L., Su, F., Yang, D., Hao, Z. and Tong, K. (2013). Discharge regime and simulation for the upstream of major rivers over Tibetan Plateau. *J. Geophys. Res.*, 118, <http://dx.doi.org/10.1002/jgrd.50665>.

Zhang X. and Tang Q (2015). Combining satellite precipitation and long - term ground observations for hydrological monitoring in China. *J. Geophys. Res.*, doi: 10.1002/2015JD023400

Zhang, Y., S. Liu, and Y. Ding (2006), Observed degree-day factors and their spatial variation on glaciers in western China, *Ann. Glaciol.*, 43(1), 301–306.

Zhu, Q., Xuan, W., Liu, L., and Xu, Y. P. (2016), Evaluation and hydrological application of precipitation estimates derived from PERSIANN-CDR, TRMM 3B42V7, and NCEP-CFSR over humid regions in China. *Hydrol. Process.*, 30:3061–3083.
